# Supplementary material for: SARS-CoV-2 vaccine effectiveness and breakthrough infections in maintenance dialysis patients
Source: bioRxiv or medRxiv preprint supplement (doi:10.1101/2021.12.20.21268124), 2021-12-21

Supplement:  
**SARS-CoV-2 vaccine effectiveness and breakthrough infections in maintenance dialysis patients**

**Authors:** Harold J. Manley<sup>1</sup>, Gideon N. Aweh<sup>1</sup>, Caroline M. Hsu<sup>2</sup>, Daniel E. Weiner<sup>2</sup>, Dana Miskulin<sup>2</sup>, Antonia M. Harford<sup>1</sup>, Doug Johnson<sup>1</sup>, Eduardo K. Lacson<sup>1,2</sup>

1. Dialysis Clinic Inc., Nashville, TN
2. Division of Nephrology, Tufts Medical Center, Boston, Massachusetts

Table S1. COVID-19 infection and COVID-related hospitalization/death rates per 10,000 patient days and vaccine effectiveness between June 27 and October 2, 2021 in patients vaccinated during Delta dominant period.

|                                            | <b>Last<br/>Vaccination<br/>Status*</b> | <b>Person<br/>Days at<br/>Risk</b> | <b>Events within 30<br/>days COVID-19<br/>diagnosis</b> | <b>Rate per<br/>10,000<br/>days</b> | <b>Adjusted Hazard<br/>Ratio (95% CI)</b> | <b>Vaccine<br/>Effectiveness<br/>(95% CI)</b> |
|--------------------------------------------|-----------------------------------------|------------------------------------|---------------------------------------------------------|-------------------------------------|-------------------------------------------|-----------------------------------------------|
| <b>COVID-19 infection</b>                  |                                         |                                    |                                                         |                                     |                                           |                                               |
| Unvaccinated                               | 2660                                    | 274,527                            | 217                                                     | 7.9                                 | Reference                                 | Reference                                     |
| Partially Vaccinated                       | 467                                     | 41,541                             | 24                                                      | 5.8                                 | 0.73 (0.47,1.11)                          | 27%                                           |
| Fully Vaccinated                           | 636                                     | 31,411                             | 11                                                      | 3.5                                 | 0.43 (0.24,0.79)                          | 57%                                           |
| BNT162b2/Pfizer                            | 321                                     | 14,325                             | 9                                                       | 6.3                                 | 0.75(0.38,1.47)                           | 25%                                           |
| mRNA-1273/Moderna                          | 268                                     | 14,315                             | 1                                                       | 0.7                                 | 0.09(0.01,0.62)                           | 91%                                           |
| Ad26.COV2.S/Janssen                        | 47                                      | 2,771                              | 1                                                       | 3.6                                 | 0.48(0.07,3.47)                           | 52%                                           |
| <b>COVID-related hospitalization/death</b> |                                         |                                    |                                                         |                                     |                                           |                                               |
| Unvaccinated                               | 2660                                    | 282,368                            | 86                                                      | 3.05                                | Reference                                 | Reference                                     |
| Partially Vaccinated                       | 467                                     | 42,216                             | 10                                                      | 2.37                                | 0.69(0.36,1.34)                           | 31%                                           |
| Fully Vaccinated                           | 636                                     | 31,696                             | 4                                                       | 1.26                                | 0.37(0.14,1.02)                           | 63%                                           |
| BNT162b2/Pfizer                            | 321                                     | 14,595                             | 4                                                       | 2.74                                | 0.79(0.29,2.16)                           | 21%                                           |
| mRNA-1273/Moderna                          | 268                                     | 14,325                             | 0                                                       | 0.00                                | n/a                                       | n/a                                           |
| Ad26.COV2.S/Janssen                        | 47                                      | 2,776                              | 0                                                       | 0.00                                | n/a                                       | n/a                                           |

CI = confidence interval; n/a = not applicable; \* = Although patients can contribute time to any vaccination status, the N in the first column refers to patients' status at the end of follow-up. Unvaccinated includes patients who never received a vaccine or recipients of a single dose of a vaccine within 14 days of vaccine receipt; partially vaccinated includes patients who were  $\geq 14$  days after the first mRNA vaccine dose but  $< 14$  days after the 2nd mRNA vaccine dose; fully vaccinated patients includes all patients  $\geq 14$  days after the last vaccine dose.

Adjusted for age, days since full vaccination status, female, number of comorbidities, race (white = reference), congregational living (e.g., nursing home, long-term care facility), hemodialysis single pool Kt/V  $\geq 1.2$  or peritoneal dialysis weekly Kt/V  $\geq 1.7$ , albumin, Hepatitis B seroimmunity defined as hepatitis B surface antibody  $\geq 10$  mIU/mL, disability, diabetes, hypertension, peripheral vascular disease, thyroid disease, cancer, county rates for Biden voters and daily rate of COVID infection.

Table S2. Parameter hazard ratios against COVID-19 related hospitalization or death.

| Parameter                                     | pre-Delta variant period                  | Delta variant dominant period             |
|-----------------------------------------------|-------------------------------------------|-------------------------------------------|
|                                               | Hazard Ratio<br>(95% Confidence Interval) | Hazard Ratio<br>(95% Confidence Interval) |
| Unvaccinated                                  | Reference                                 | Reference                                 |
| Partially Vaccinated                          | 1.21 (0.77, 1.90)                         | 0.79 (0.44, 1.42)                         |
| Fully vaccinated BNT162b2/Pfizer              | <b>0.22 (0.07, 0.67)</b>                  | <b>0.17 (0.10, 0.31)</b>                  |
| Fully vaccinated mRNA-1273/Moderna            | <b>0.08 (0.02, 0.30)</b>                  | <b>0.09 (0.05, 0.17)</b>                  |
| Fully vaccinated Ad26.COV2.S/Janssen          | 0.55 (0.12, 2.61)                         | <b>0.19 (0.08, 0.43)</b>                  |
| Weeks since full vaccination status           | 1.04 (0.93, 1.17)                         | <b>1.17 (1.11, 1.23)</b>                  |
| Age (per decade)                              | 1.29 (0.82, 2.05)                         | 0.94 (0.86, 1.04)                         |
| Female                                        | <b>1.55 (1.10, 2.20)</b>                  | 1.08 (0.83, 1.40)                         |
| Race - Black (reference = White)              | 1.03 (0.69, 1.54)                         | 1.10 (0.82, 1.47)                         |
| Race - Other (reference = White)              | 1.22 (0.75, 1.99)                         | 1.02 (0.70, 1.48)                         |
| Congregate living <sup>a</sup>                | <b>2.12 (1.37, 3.28)</b>                  | <b>1.97 (1.44, 2.70)</b>                  |
| Albumin g/dL (continuous)                     | 1.00 (0.69, 1.45)                         | <b>0.47 (0.37, 0.60)</b>                  |
| Hepatitis B surface antibody $\geq 10$ mIU/mL | 0.70 (0.47, 1.03)                         | <b>0.67 (0.47, 0.95)</b>                  |
| History of failed transplant                  | 0.49 (0.18, 1.33)                         | <b>0.44 (0.19, 0.99)</b>                  |
| Number of comorbidities                       | 0.92 (0.81, 1.04)                         | 1.08 (1.00, 1.18)                         |
| Diabetes                                      | 0.97 (0.66, 1.42)                         | <b>1.39 (1.03, 1.88)</b>                  |
| Hypertension                                  | 1.52 (0.88, 2.62)                         | 1.16 (0.76, 1.77)                         |

<sup>a</sup> = Residing in nursing home or long-term care facility; Unvaccinated includes patients who never received a vaccine or recipients of a single dose of a vaccine within 14 days of vaccine receipt; partially vaccinated includes patients who were  $\geq 14$  days after the first mRNA vaccine dose but  $< 14$  days after the 2nd mRNA vaccine dose; fully vaccinated patients includes all patients  $\geq 14$  days after the last vaccine dose.

Table S3. Parameter hazard ratios against COVID-19 related hospitalization or death in patients vaccinated during Delta variant dominant period.

| Parameter                                     | Hazard Ratio<br>(95% Confidence Interval) |
|-----------------------------------------------|-------------------------------------------|
| Unvaccinated                                  | Reference                                 |
| Partially Vaccinated                          | 0.85 (0.44, 1.61)                         |
| Fully vaccinated BNT162b2/Pfizer              | 0.56 (0.10, 3.26)                         |
| Fully vaccinated mRNA-1273/Moderna            | n/a                                       |
| Fully vaccinated Ad26.COV2.S/Janssen          | n/a                                       |
| Weeks since full vaccination status           | 1.05 (0.79, 1.40)                         |
| Age (per decade)                              | 0.91 (0.80, 1.03)                         |
| Female                                        | 1.40 (0.96, 2.04)                         |
| Race - Black (reference = White)              | 1.16 (0.77, 1.74)                         |
| Race - Other (reference = White)              | 1.22 (0.71, 2.10)                         |
| Congregate living <sup>a</sup>                | <b>2.01 (1.27, 3.22)</b>                  |
| Albumin g/dL (continuous)                     | 0.75 (0.52, 1.07)                         |
| Hepatitis B surface antibody $\geq 10$ mIU/mL | 0.58 (0.16, 2.07)                         |
| History of failed transplant                  | 0.50 (0.16, 1.60)                         |
| Number of comorbidities                       | 1.13 (1.00, 1.28)                         |
| Diabetes                                      | 1.23 (0.81, 1.88)                         |
| Hypertension                                  | 1.39 (0.74, 2.64)                         |

<sup>a</sup> = Residing in nursing home or long-term care facility; Unvaccinated includes patients who never received a vaccine or recipients of a single dose of a vaccine within 14 days of vaccine receipt; partially vaccinated includes patients who were  $\geq 14$  days after the first mRNA vaccine dose but  $< 14$  days after the 2nd mRNA vaccine dose; fully vaccinated patients includes all patients  $\geq 14$  days after the last vaccine dose

Figure S1. Cumulative percent COVID-19 breakthrough infections relative to days since full vaccination status overall (panel A) and by vaccine type (panel B)

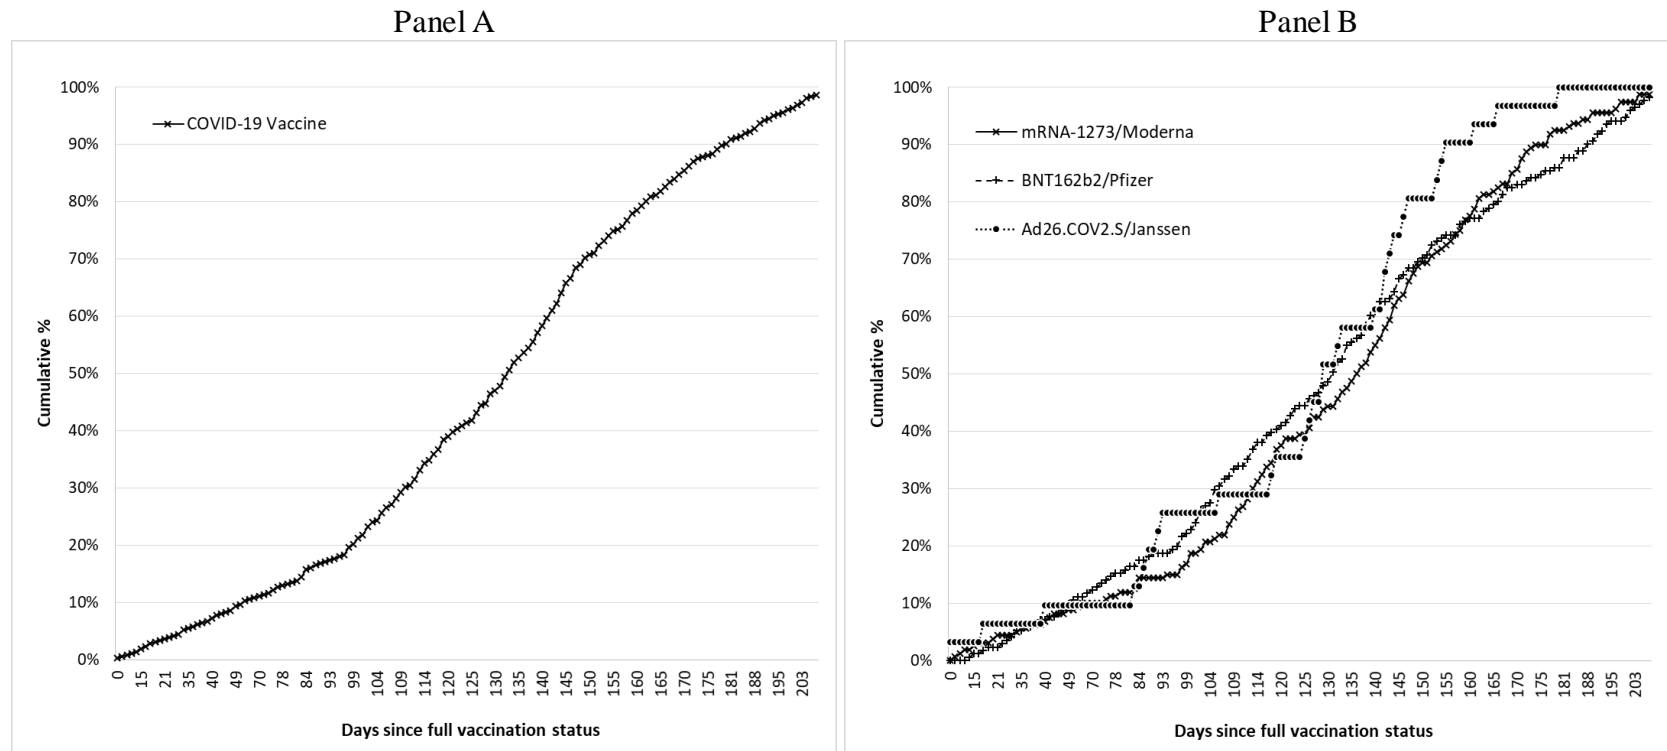

Supplement: Supplementary file [file media-1.pdf]
